# Supplementary material for: The majority of patients with long-duration type 1 diabetes are insulin microsecretors and have functioning beta cells
Source: Springer Nature journal article supplement (doi:10.1007/s00125-013-3067-x), 2013-10-11
Supplement: MOESM2 [file 8091898]

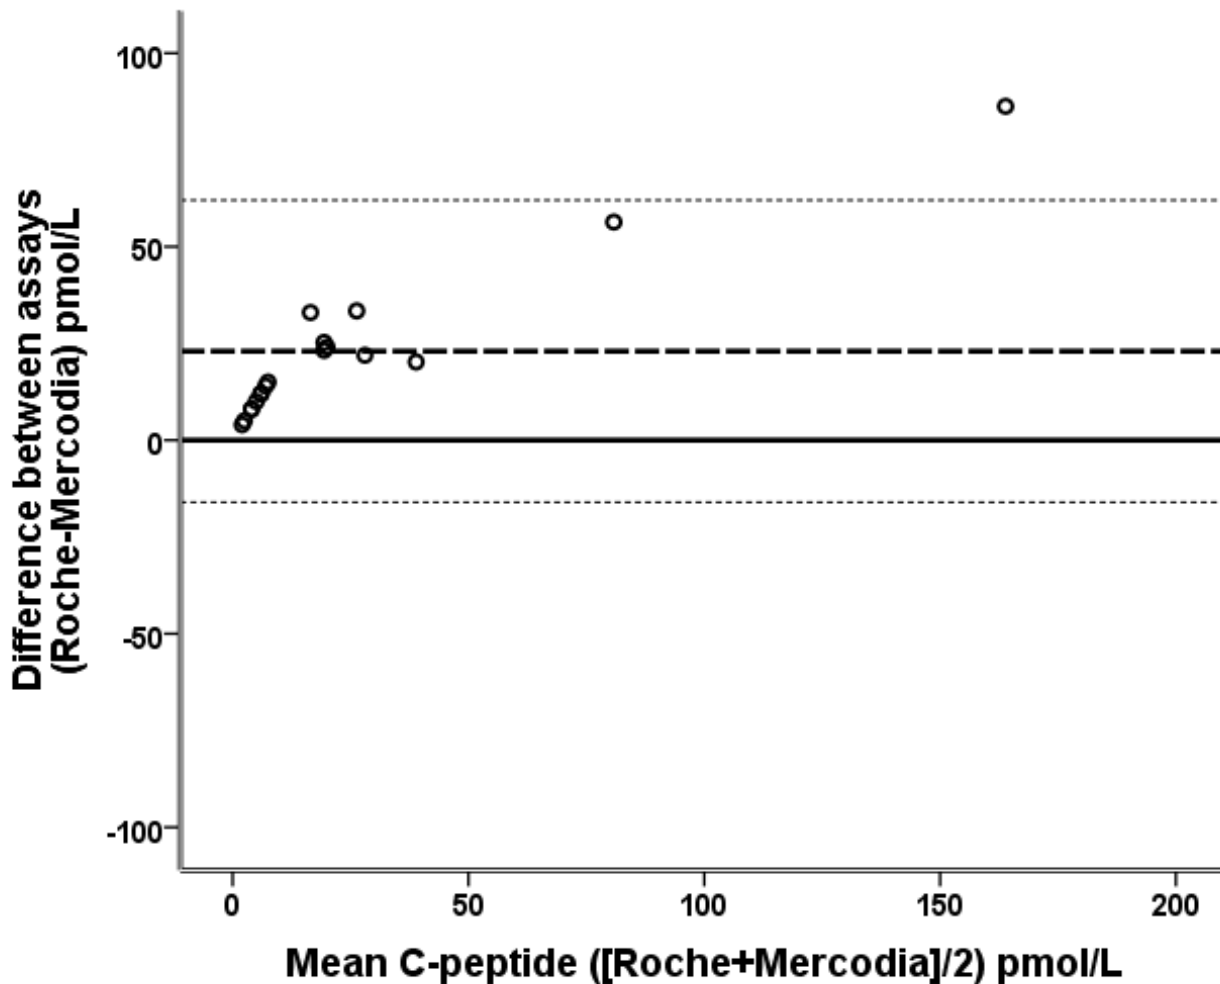

Supplementary figure 1. Bland-Altman plot comparing Roche serum C-peptide electrochemiluminescence assay with Mercodia Ultrasensitive ELISA. Mean difference (standard deviation) was 23 (20) pmol/l
